# Supplementary material
Source: Springer Nature journal article supplement (https://www.springermedizin.de/resource/supplementary/12985_2012_2145_MOESM3_ESM.pdf/9606054)

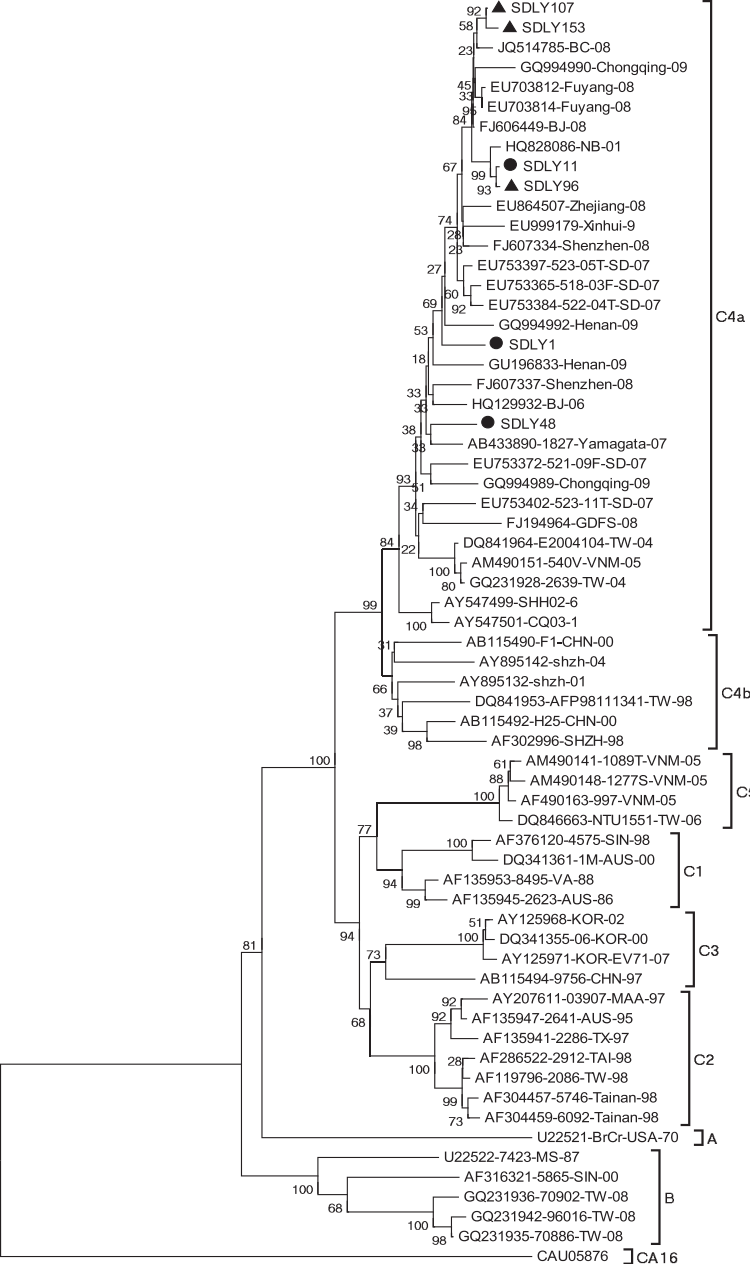

Supplement: MOESM3 [file 9606054]
